# Supplementary material
Source: publisher site journal article supplement (https://www.spandidos-publications.com/3301/downloadSupplementary)

Figure S1. Molecular mechanism by which lncRNA TUG1 regulates human pulmonary microvascular endothelial cell apoptosis induced by CSE. lncRNA TUG1, long non-coding RNA taurine-upregulated gene 1; CSE, cigarette smoke extract; BCL2L11, Bcl-2 like 11; HPMEC, human pulmonary microvascular endothelial cell; miR, microRNA.

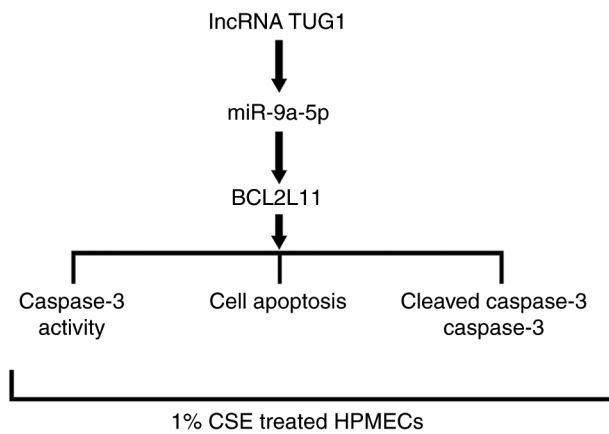

Supplement: Supplementary file 1 [file downloadSupplementary]
